# Supplementary material for: Revised roles of ISL1 in a hES cell-based model of human heart chamber specification
Source: eLife. 2018 Jan 16;7:e31706. doi: 10.7554/eLife.31706 (PMC5770158; doi:10.7554/eLife.31706)
Supplement: Supplementary file 2. — (A) Baseline AP measurements of four groups of hESC-CM samples: WT and ISL1 KO cells differentiated with or without RAd3,4. MDP: maximum membrane depolarization; APAmax: maximum AP amplitude; Vmax: maximum upstroke velocity; APD20, APD50, APD90: AP duration at 20, 50% and 90% of repolarization, respectively; APAplat: plateau amplitude. Conditional formatting highlights the enhanced atrial phenotype of RA-treated ISL1 KO cells. (B) Relative AP parameter values following treatment of the cells with the KCNA5 inhibitor 4-AP (50 µM). Data in each group are expressed as % of untreated controls which were set to 100. Relative changes are highlighted using conditional formatting. [file elife-31706-supp2.xlsx]

## Sheet: (A) Baseline
	WT -RA	SEM (n = 10)	WT +RA	SEM (n = 10)	ISL1 KO -RA	SEM (n = 10)	ISL1 KO +RA	SEM (n = 9)
MDP [mV]	-83.377	0.544	-81.978	0.667	-83.135	0.463	-82.015	0.454
APAmax [mV]	119.413	1.74	113.798	1.358	117.982	2.642	110.5	4.974
Vmax [mV/ms]	153.842	15.227	194.612	15.92	182.472	30.704	203.761	37.141
APD20 [ms]	123.679	16.707	16.56	2.55	31.711	7.603	5.479	0.838
APD50 [ms]	190.823	22.625	58.544	6.373	66.532	9.147	20.29	4.409
APD90 [ms]	213.195	22.167	99.032	7.279	90.63	7.394	65.835	7.918
APAplat [mV]	115.489	1.861	86.722	1.953	95.767	6.168	48.137	8.172

## Sheet: (B) 4-AP treatments
	WT -RA	SEM (n = 6)	WT +RA	SEM (n = 7)	ISL1 KO -RA	SEM (n = 7)	ISL1 KO +RA	SEM (n = 6)
MDP [%]	99.858	0.153	100.166	0.273	100.48	0.494	100.678	0.453
APAmax [%]	99.577	0.585	101.658	0.767	101.887	1.119	103.048	1.16
Vmax [%]	98.996	3.033	102.584	4.321	101.228	2.788	101.947	2.55
APD20 [%]	100.005	3.073	179.344	20.898	152.317	9.078	312.164	64.633
APD50 [%]	100.312	2.195	139.259	7.754	144.989	12.593	258.429	56.413
APD90 [%]	100.515	1.82	114.51	2.318	122.067	8.315	121.418	7.449
APAplat [%]	99.481	0.769	111.041	2.808	108.203	1.766	163.382	17.28
