# Supplementary material for: Revised roles of ISL1 in a hES cell-based model of human heart chamber specification
Source: eLife. 2018 Jan 16;7:e31706. doi: 10.7554/eLife.31706 (PMC5770158; doi:10.7554/eLife.31706)
Supplement: Supplementary file 3. — Genomic regions with enriched ISL1 binding as compared to input ChIP DNA. Cells were captured on day 5 of directed cardiac differentiation. Up to two nearest gene loci within 1 Mb are indicated for each hit region. Columns J and M contain expression ratios between ISL1-positive versus ISL1-deficient hESCs at day 5 of differentiation, as extracted from Supplementary file 1, to indicate which binding events may directly translate into differential gene expression. Up or downregulated genes are indicated using conditional formatting (green or red shading, respectively). [file elife-31706-supp3.xls]

## Sheet: ISL1 target regions
Chromosome	Binding region start	Binding region end	Binding region size	Pileup	P value	Fold enrichment vs. input	Nearest gene 1	Distance to TSS	Day 5 expression ratio ISL1 vs. no ISL1 from Table S1	Nearest gene 2	Distance to TSS	Day 5 expression ratio ISL1 vs. no ISL1 from Table S1
chr1	11238548	11238659	113	14	1.6296e-15	8.86038	EXOSC10	-78666	0.855884	ANGPTL7	-10794	1
chr1	17052308	17052484	178	21	3.33964e-12	5.34216	CROCC	-196049	1.10101	NBPF1	-112414	2.74943
chr1	41051322	41051449	129	14	5.16238e-13	7.35512	ZNF684	54153	0.318043	RIMS3	79943	1.00406
chr1	54059831	54059999	170	9	9.50298e-10	6.25431	DMRTB1	134843	1	GLIS1	139962	0.778198
chr1	54060227	54060302	77	10	5.14956e-11	6.87974	DMRTB1	135193	1	GLIS1	139612	0.778198
chr1	56021937	56022033	98	10	2.35072e-10	6.49761	USP24	-341199	0.867659
chr1	57532667	57532833	168	20	2.09532e-24	12.5979	C8B	-101062	1	DAB1	356979	1
chr1	60135761	60135891	132	10	1.48279e-08	5.39376	HOOK1	-144707	0.948928	FGGY	373173	0.750031
chr1	82314677	82314856	181	14	2.79602e-11	6.28704	LPHN2	48685	1.55869
chr1	88108755	88108830	77	8	5.45105e-08	5.31623	LMO4	314642	2.50391
chr1	144163148	144163226	80	17	1.49792e-14	7.54445	NBPF8	16375	1.17759	PPIAL4B	201059
chr1	162859912	162860102	192	22	1.0712e-25	12.7754	RGS4	-178558	2.27429	HSD17B7	99471	0.948063
chr1	164742014	164742152	140	12	2.69532e-13	7.92554	PBX1	213211	1.68938	LMX1A	583869	1
chr1	177099907	177100001	96	11	2.55982e-12	7.50517	ASTN1	33872	3.31347	PAPPA2	667647	1
chr1	187225387	187225515	130	16	9.97333e-10	4.96314	PLA2G4A	427366	1
chr1	193538360	193538502	144	14	7.89187e-15	8.45711	B3GALT2	-382647	1
chr1	218908989	218909167	180	11	1.35111e-11	7.0883	LYPLAL1	-438108	1.16871	TGFB2	389501	3.30288
chr1	220138711	220138827	118	10	1.03386e-10	6.70622	SLC30A10	-36825	1	EPRS	81231	1.02523
chr1	233170754	233170903	151	9	3.75223e-09	5.90692	NTPCR	84459		PCNXL2	260630	0.67463
chr1	245491254	245491340	88	13	5.0128e-15	8.75603	KIF26B	173010	1.2735
chr1	245734868	245734991	125	10	5.14956e-11	6.87974	KIF26B	416643	1.2735	SMYD3	935589	1.14455
chr1	245778166	245778247	83	11	1.35111e-11	7.0883	KIF26B	459920	1.2735	SMYD3	892312	1.14455
chr2	7988345	7988427	84	11	1.27523e-09	5.8841	ID2	-830589	0.731523	RNF144A	930863	0.868067
chr2	30558064	30558249	187	12	7.17315e-13	7.679	LCLAT1	-111966	1.76501	LBH	103760	2.41068
chr2	36710130	36710205	77	9	3.75223e-09	5.90692	FEZ2	115166	0.690539	CRIM1	127099	1.51518
chr2	42175757	42175832	77	9	3.75223e-09	5.90692	PKDCC	-99365	2.56959
chr2	48127201	48127296	97	12	4.25412e-13	7.8112	FBXO11	5683	0.711298	MSH6	117028	0.956565
chr2	53737095	53737291	198	15	7.03882e-17	9.45107	CHAC2	-257736	1
chr2	53803150	53803243	95	10	5.14956e-11	6.87974	CHAC2	-191732	1
chr2	79389290	79389366	78	13	2.40735e-13	7.77633	CTNNA2	-23029	2.61658	REG3A	-2542	2.31461
chr2	80593057	80593209	154	10	1.64786e-10	6.58835	LRRTM1	-61259	2.073
chr2	100589668	100589757	91	14	1.28e-14	8.33179	REV1	-483216	0.710683	AFF3	132332	0.795919
chr2	100590932	100591032	102	11	2.55982e-12	7.50517	REV1	-484485	0.710683	AFF3	131063	0.795919
chr2	130237571	130237683	114	10	2.35072e-10	6.49761	RAB6C	-499608	1
chr2	131286987	131287083	98	9	9.50298e-10	6.25431	CFC1B	8265	1.42394	ENSG00000184761	20421
chr2	131348855	131348930	77	8	3.95531e-08	5.3991	CFC1	8230	1.68088	ENSG00000183292	20434
chr2	150026022	150026287	267	9	1.58256e-07	4.90342	LYPD6	-160896	1.5647	LYPD6B	131174	1.87826
chr2	179914856	179914988	134	26	3.60155e-28	12.8953	CCDC141	-136	4.84159	SESTD1	214595	0.768192
chr2	192344137	192344212	77	9	3.75223e-09	5.90692	NABP1	-199083		MYO1B	234060	1.22462
chr2	202771922	202772257	337	22	1.64999e-28	14.3849	FZD7	-127220	1.32593	CDK15	100788
chr2	208844669	208844758	91	10	5.14956e-11	6.87974	FZD5	-210427	1.15815	PLEKHM3	45570	1
chr2	216552147	216552289	144	17	7.40525e-19	10.1485	FN1	-251323	2.93752	MREG	326128	1.20923
chr2	218114287	218114388	103	10	1.39444e-10	6.63073	TNP1	-389551	1	TNS1	694513	0.575725
chr2	238503731	238503829	100	9	9.50298e-10	6.25431	LRRFIP1	-97202	0.779476	RAB17	-4044	0.618637
chr3	18279061	18279136	77	8	5.45105e-08	5.31623	TBC1D5	-537587	0.990485	SATB1	186966	0.574424
chr3	25496101	25496203	104	11	1.27523e-09	5.8841	RARB	26350	1.892	TOP2B	209838	1.02832
chr3	36335363	36335438	77	11	3.88106e-10	6.20565	STAC	-86435	3.26765	ARPP21	653523
chr3	37546216	37546293	79	12	1.0134e-10	6.37444	CTDSPL	-357410	0.881752	ITGA9	52645	0.643491
chr3	55742356	55742518	164	10	6.63315e-11	6.8171	WNT5A	-218464	2.11351	ERC2	759954	2.20771
chr3	61934659	61934842	185	15	2.22515e-16	9.15867	PTPRG	387166	1.70579	FEZF2	424439	1
chr3	81913622	81913697	77	8	7.77481e-08	5.22354	GBE1	-102348	1.09603
chr3	99846635	99846828	195	19	7.51519e-17	8.38272	TMEM30C	-57799		FILIP1L	-13375	1.31258
chr3	111809823	111809994	173	13	5.0128e-15	8.75603	C3orf52	4727	0.941749	GCSAM	42192
chr3	119379813	119379981	170	38	5.67035e-56	24.3918	POPDC2	-460	3.23386	COX17	16353	1.2645
chr3	124491101	124491211	112	9	9.50298e-10	6.25431	UMPS	41943	0.624507	ITGB5	114988	1.36035
chr3	169118871	169118976	107	13	1.45134e-14	8.49375	MECOM	-254831		ACTRT3	368759
chr3	169228299	169228401	104	12	1.17525e-13	8.1306	MECOM	-364257		ACTRT3	259333
chr3	172807177	172807390	215	21	5.23444e-25	12.6706	SPATA16	51774	1	ECT2	338790	0.909288
chr3	176568219	176568408	191	9	1.24489e-09	6.18713	TBL1XR1	345952	0.876712
chr3	181430279	181430468	191	10	5.14956e-11	6.87974	SOX2	652	0.603233
chr3	181898530	181898675	147	15	7.03882e-17	9.45107	ATP11B	-612685	1.23941	SOX2	468881	0.603233
chr3	189562935	189563050	117	8	5.49693e-08	5.31405	TP63	213777	2.77504	LEPREL1	275725	1.31259
chr4	21754821	21754904	85	11	1.35111e-11	7.0883	KCNIP4	195559	16.9898
chr4	30746998	30747073	77	10	1.48279e-08	5.39376	PCDH7	23991	4.24969
chr4	30839005	30839087	84	9	1.58256e-07	4.90342	PCDH7	116001	4.24969
chr4	53740125	53740228	105	14	1.99627e-16	9.38146	RASL11B	11720	1.44787	SCFD2	492065	0.456261
chr4	77511564	77511660	98	9	2.52429e-09	6.00862	SEPT11	-359244	1.10803	SHROOM3	155359	1.34826
chr4	80004738	80004868	132	15	1.99402e-16	9.18673	PAQR3	-144211	0.956377	NAA11	242401
chr4	141013679	141013798	121	16	2.86233e-18	10.0418	MAML3	61599	1	MGST2	426817	0.856518
chr4	153127555	153127630	77	11	2.55982e-12	7.50517	PET112	-445418		FBXW7	329660	0.829548
chr5	17154443	17154540	99	10	5.11199e-10	6.29659	MYO10	-218120	1.21126	BASP1	-63177	1.00339
chr5	18433611	18433718	109	14	1.6296e-15	8.86038
chr5	33363182	33363340	160	11	1.27523e-09	5.8841	TARS	-77810	0.814993	NPR3	651721	1
chr5	43854901	43855054	155	14	9.41109e-16	8.9985	NNT	252153	0.398906	FGF10	533921	8.20377
chr5	51630149	51630322	175	9	2.50963e-07	4.77603	ITGA1	-453494	0.90786	ISL1	951315	0.720196
chr5	73812074	73812150	78	12	3.09835e-09	5.44877	ENC1	125137	3.54324	ARHGEF28	890129
chr5	77932541	77932832	293	34	1.35609e-46	20.6658	LHFPL2	11961	2.45967	SCAMP1	276348	0.716604
chr5	88425043	88425285	244	15	1.07439e-16	9.34417	MEF2C	-225265	3.77705
chr5	92442951	92443089	140	10	2.3752e-10	6.49495	NR2F1	-476023	0.183321
chr5	93226468	93226556	90	13	8.48614e-13	7.44535	POU5F2	-149169	1	FAM172A	220828	1.07835
chr5	112420602	112420744	144	14	1.6296e-15	8.86038	DCP2	108240	0.78994	TSSK1B	350055	0.564598
chr5	112539139	112539298	161	14	1.6296e-15	8.86038	DCP2	226786	0.78994	TSSK1B	231509	0.564598
chr5	115864181	115864310	131	11	3.16621e-11	6.869	SEMA6A	46384	1.3873	COMMD10	443558	0.860863
chr5	124074642	124074763	123	9	3.75223e-09	5.90692	ZNF608	6415	1.37094
chr5	124244715	124244808	95	10	3.51091e-10	6.39423	ZNF608	-163644	1.37094
chr5	134529950	134530029	81	9	3.75223e-09	5.90692	PITX1	-160002	0.289038	H2AFY	205322	0.618805
chr5	166152819	166152946	129	13	3.04523e-10	5.86791	TENM2	-558921
chr5	168456824	168456977	155	9	1.78521e-09	6.09657	PANK3	-450296	0.747977	SLIT3	271232	0.458089
chr5	173764955	173765083	130	12	1.17525e-13	8.1306	MSX2	-386517	1.47438	ENSG00000170091	292412
chr6	14306027	14306169	144	11	2.55982e-12	7.50517	JARID2	-940429	0.852945	CD83	188226	0.708324
chr6	24584295	24584395	102	10	1.48279e-08	5.39376	KIAA0319	62038	21.3012	ALDH5A1	89148	0.962778
chr6	24873172	24873252	82	8	7.53824e-08	5.23164	FAM65B	37983	0.77575	GMNN	98046	1.03147
chr6	31138034	31138133	101	11	2.55982e-12	7.50517	POU5F1	386	1.82486	TCF19	11765	1.3799
chr6	35206702	35206777	77	9	3.75223e-09	5.90692	ZNF76	-20709	1.10747	SCUBE3	24544	0.861743
chr6	50559113	50559198	87	11	1.07258e-10	6.54898	DEFB112	-542792	1	TFAP2D	-122385	1
chr6	80520010	80520170	162	18	1.08835e-15	7.96359	ELOVL4	137207	1.85329	SH3BGRL2	179090	1.64535
chr6	80920434	80920630	198	12	3.09835e-09	5.44877	BCKDHB	104168	1.45556
chr6	85270274	85270411	139	19	4.17186e-22	11.5364	KIAA1009	-332990	0.716233	TBX18	203894	1.72532
chr6	106603028	106603140	114	10	1.48279e-08	5.39376	PRDM1	68889	0.229957	ATG5	170582	1.07784
chr6	114098427	114098603	178	9	3.75223e-09	5.90692	MARCKS	-80026	0.600628
chr6	119491730	119491805	77	12	1.81151e-12	7.44142	FAM184A	-91860	1.18658	MAN1A1	179158	0.5646
chr6	144068546	144068621	77	9	4.36999e-09	5.86753	LTV1	-95897	0.826104	PHACTR2	69482	0.76919
chr6	147760476	147760596	122	10	5.14956e-11	6.87974	STXBP5	234867	1.20525
chr6	155429661	155429818	159	9	9.50298e-10	6.25431	CLDN20	-155407	2.99218	TIAM2	275909	5.12187
chr7	33843992	33844067	77	12	2.69532e-13	7.92554	BMPER	-100493	1.5526	BBS9	674886	1.42207
chr7	40611544	40611666	124	10	7.59381e-11	6.78345	C7orf10	437030	1.01822
chr7	41969926	41970001	77	9	9.50298e-10	6.25431	INHBA	-227258	1	GLI3	306648	1.21421
chr7	68697839	68697917	80	10	2.35072e-10	6.49761	AUTS2	-366441	1.84168
chr7	86594490	86594709	221	28	3.13827e-35	16.3504	KIAA1324L	94415	1.37732	GRM3	321370	1.314
chr7	117569420	117569558	140	8	1.81147e-07	4.99907	NAA38	-254597		CTTNBP2	-55928	1.79233
chr7	124120143	124120330	189	16	5.38939e-18	9.882	TMEM229A	-446714		GPR37	285444	0.594917
chr7	131333441	131333564	125	15	7.03882e-17	9.45107	PODXL	-92137	1.24986	PLXNA4	928557	0.739467
chr7	133187341	133187424	85	12	4.09609e-08	4.75785	LRGUK	-624669	1	EXOC4	249554	1.23281
chr7	139351176	139351296	122	15	7.45538e-18	10.0069	HIPK2	126281	1.36148	CLEC2L	142634	1
chr8	11799843	11799949	108	13	5.0128e-15	8.75603	CTSB	-74158	0.900843	DEFB136	32212
chr8	13739998	13740073	77	12	1.15726e-12	7.55682	C8orf48	315684	0.817259
chr8	23556334	23556684	352	20	3.82719e-25	13.0145	NKX3-1	-16069	3.45697	NKX2-6	7602	26.1016
chr8	31398504	31398579	77	9	1.19492e-09	6.19736	WRN	507225	2.21773
chr8	33202047	33202122	77	11	2.09725e-11	6.97553	FUT10	128855	1.50832	NRG1	796357	0.477508
chr8	38424692	38424832	142	13	5.0128e-15	8.75603	TACC1	-219960	0.793381	FGFR1	-99399	0.762978
chr8	49072369	49072478	111	10	1.71732e-10	6.57784	UBE2V2	151464	0.949271	EFCAB1	575367	0.4871
chr8	86732912	86733018	108	22	5.021e-09	3.78989	REXO1L1	-157239	1	REXO1L11P	-14578
chr8	86770027	86770102	77	22	2.24414e-09	3.93128	REXO1L10P	-11320		PSKH2	311861	0.335712
chr8	93640255	93640352	99	11	1.27523e-09	5.8841	RUNX1T1	-532598	0.513065	TRIQK	338069
chr8	99051443	99051563	122	12	7.17315e-13	7.679	RPL30	6239	1.14586	MATN2	151298	1.87557
chr8	123092677	123092779	104	8	6.44748e-08	5.27253	ZHX2	-700905	1.9483	HAS2	-439098	0.812841
chr8	135952721	135952796	77	8	5.45105e-08	5.31623	KHDRBS3	-516941	0.644045	ZFAT	-227478	0.725993
chr8	142861360	142861435	77	11	1.35111e-11	7.0883	PTP4A3	459305	3.09056	TSNARE1	623145	1
chr9	546794	546879	87	12	1.0134e-10	6.37444	DMRT1	-294853	19.7971	KANK1	76546	7.27103
chr9	707448	708319	873	41	1.76653e-61	26.2681	DMRT1	-133806	19.7971	KANK1	237593	7.27103
chr9	2771306	2771476	172	15	7.03882e-17	9.45107	KCNV2	53889	1	KIAA0020	72850	1.23023
chr9	21047449	21047574	127	14	2.84008e-15	8.71941	PTPLAD2	-15877	0.911504	IFNB1	30431	1
chr9	28770976	28771102	128	10	1.48279e-08	5.39376	LINGO2	-100756	1
chr9	84295598	84295722	126	10	1.03386e-10	6.70622	TLE1	8560	0.621958
chr9	87992685	87992780	97	11	6.89922e-11	6.66543	AGTPBP1	364000	0.395225	NTRK2	709267	2.84397
chr9	102174203	102174324	123	12	3.09835e-09	5.44877	NR4A3	-414745	0.478743	SEC61B	189681	1.12827
chr9	110250040	110250129	91	10	5.14956e-11	6.87974	KLF4	1842	2.33908	RAD23B	204525	1.04189
chr9	112528352	112528435	85	10	2.35072e-10	6.49761	PTPN3	-267808	0.917395	PALM2-AKAP2	-14195	1
chr9	112869173	112869365	194	18	4.28174e-22	11.775	TXN	149651	1.03421	AKAP2	326500	0.625565
chr10	4125786	4125980	196	9	1.58256e-07	4.90342	AKR1E2	-742563	0.960584	KLF6	-298416	0.419752
chr10	11220617	11220698	83	11	2.55982e-12	7.50517	CELF2	160765		USP6NL	353616	0.735527
chr10	14013933	14014032	101	11	2.55982e-12	7.50517	FRMD4A	358900	0.968497	PRPF18	385056	1.1213
chr10	18744547	18744640	95	14	5.16238e-13	7.35512	NSUN6	195957	1.15999	CACNB2	314988	2.19306
chr10	26055825	26055910	87	8	1.59577e-08	5.62888	MYO3A	-167328	0.50328	GPR158	591877	1
chr10	29367995	29368170	177	12	7.2624e-13	7.67585	LYZL1	-209907	0.49215	BAMBI	401812	1.31859
chr10	33621469	33621622	155	8	5.49693e-08	5.31405	ITGB1	-374724	1.15043	NRP1	3644	2.38361
chr10	44440622	44440792	172	15	7.03882e-17	9.45107	ZNF32	-296555	0.579845	CXCL12	439790	0.67677
chr10	52287386	52287497	113	10	5.11199e-10	6.29659	ASAH2	-279072	1.40614	SGMS1	96301	0.839287
chr10	78973055	78973130	77	10	5.14956e-11	6.87974	KCNMA1	424307	0.488107
chr10	80348092	80348167	77	9	3.75223e-09	5.90692	ZMIZ1	-480662	1.04114	RPS24	554612	1.32382
chr10	85385918	85386018	102	10	1.86423e-10	6.55692	GHITM	-513228	0.991316
chr10	100133641	100133716	77	11	2.55982e-12	7.50517	LOXL4	-105672	2.67478	PYROXD2	41262
chr10	101315330	101315507	179	12	2.69532e-13	7.92554	NKX2-3	22729	1.34574	SLC25A28	64702	1.10073
chr10	103428350	103428517	169	20	1.63538e-20	10.2972	FBXW4	26582	2.58727	DPCD	80389
chr10	112461575	112461744	171	10	5.14956e-11	6.87974	PDCD4	-169905	0.860002	RBM20	57505	1.47819
chr10	129222340	129222459	121	12	1.17525e-13	8.1306	NPS	-125213	1	DOCK1	628422	0.675044
chr11	3972769	3972887	120	8	1.59577e-08	5.62888	RRM1	-143211	0.824397	STIM1	95896	0.653857
chr11	19814232	19814320	90	13	5.0128e-15	8.75603	NAV2	79133	0.323781	DBX1	367594	1
chr11	30656911	30657086	177	13	2.23919e-14	8.38518	MPPED2	-54956	3.13024	DCDC1	734322	1
chr11	34265795	34265870	77	9	2.6212e-09	5.999	ABTB2	113722	5.85479	NAT10	138684	1.34702
chr11	44219815	44219908	95	13	3.53818e-14	8.26969	EXT2	102115	1.09658	ALX4	111854	1
chr11	78651576	78651714	140	10	6.67898e-09	5.6111	NARS2	-365736	0.954093	TENM4	500050
chr11	78830641	78830725	86	10	1.48279e-08	5.39376	NARS2	-544774	0.954093	TENM4	321012
chr11	100679760	100679943	185	17	2.7858e-20	10.9738	TMEM133	-182959	3.10174	ARHGAP42	121445
chr11	100718574	100718721	149	11	5.49263e-12	7.31588	TMEM133	-144163	3.10174	ARHGAP42	160241
chr11	113421013	113421104	93	16	2.86233e-18	10.0418	DRD2	-74948	1	TMPRSS5	156036	1
chr11	131685601	131685785	186	15	7.03882e-17	9.45107	SNX19	-899289	1.02701	NTM	-95663	3.78861
chr12	5663768	5663880	114	11	1.35111e-11	7.0883	NTF3	122545	0.535999	ANO2	391574	2.00881
chr12	12846409	12846542	135	13	3.53818e-14	8.26969	CDKN1B	-23582	1.1874	GPR19	-9021	2.68965
chr12	27263165	27263286	123	16	2.86233e-18	10.0418	STK38L	-133882	0.95254	MED21	87743	1.20488
chr12	44725257	44725334	79	11	3.16621e-11	6.869	TMEM117	495395	0.76822	NELL2	545584	0.514622
chr12	59319028	59319208	182	12	7.17315e-13	7.679	SLC16A7	-764000	1	LRIG3	-4815	2.22047
chr12	65979591	65979682	93	12	7.17315e-13	7.679	HMGA2	-238274	0.531496	MSRB3	307214	0.694089
chr12	74006470	74006591	123	10	5.27242e-11	6.87392
chr12	85135742	85135929	189	14	1.14099e-13	7.75706	SLC6A15	170819	0.832845
chr12	85744172	85744275	105	12	4.77628e-12	7.18892	ALX1	70339	1.41098	RASSF9	486124	0.503831
chr12	90470698	90470835	139	9	3.75223e-09	5.90692	ATP2B1	-368159	0.302985	EPYC	928036	1
chr12	93694401	93694602	203	12	1.17525e-13	8.1306	EEA1	-371395	1.07106	NUDT4	-77157	0.740375
chr12	114590043	114590160	119	15	1.08363e-17	9.91578	RBM19	-185991	1.37927	TBX5	256145	1
chr13	28924180	28924274	96	12	7.17315e-13	7.679	FLT1	145005	1	PAN3	211584	0.844023
chr13	80373419	80373538	121	11	1.35111e-11	7.0883	NDFIP2	318192	0.977531	SPRY2	540315	1.66085
chr13	81867883	81868041	160	10	1.48279e-08	5.39376	SPRY2	-954168	1.66085
chr13	99624999	99625096	99	16	7.84711e-19	10.3642	SLC15A1	-220140	1	DOCK9	5196	1.50792
chr13	113366179	113366258	81	13	3.53818e-14	8.26969	MCF2L	-257316	1	ATP11A	21576	1
chr14	104283478	104283593	117	10	2.5623e-07	4.6105	PPP1R13B	30391	1.94361	ZFYVE21	101469	1.07908
chr15	37234129	37234214	87	9	6.18686e-09	5.7771	MEIS2	157914	0.837677
chr15	66180076	66180160	86	13	7.48428e-12	6.86478	RAB11A	18322	1.01506	MEGF11	365967	1
chr15	67434767	67434966	201	21	6.34366e-27	13.7595	SMAD3	76684	0.964173	AAGAB	112207	1.15845
chr15	78974057	78974210	155	16	2.62114e-19	10.6323	CHRNB4	-40547	2.18963	ADAMTS7	129639	0.99097
chr15	85680934	85681014	82	10	2.35072e-10	6.49761	AKAP13	-242986	0.612865	PDE8A	157303	0.388937
chr15	90886114	90886248	136	11	2.55982e-12	7.50517	GABARAPL3	6488		NGRN	77244	1.23022
chr16	16874525	16874612	89	11	1.35111e-11	7.0883	NOMO3	548217	3.86531	XYLT1	690169	1.95034
chr16	24220108	24220204	98	12	1.17525e-13	8.1306	CACNG3	-46718	1	PRKCB	372811	0.882637
chr16	46791588	46791740	154	11	2.55982e-12	7.50517	MYLK3	-9443	2.09611	C16orf87	73659	1.14195
chr16	70970845	70970920	77	11	2.55982e-12	7.50517	VAC14	-135819	1.01148	HYDIN	293709	0.432
chr16	77795239	77795334	97	11	2.55982e-12	7.50517	VAT1L	-27140	9.16016	NUDT7	38876	1.79648
chr17	18965540	18965644	106	10	5.14956e-11	6.87974	EPN2	-175062	1.97727	GRAP	-14642	0.598111
chr17	58984758	58984872	116	14	3.20612e-14	8.09197	TBX2	-492442	0.459982	BCAS3	229565	1.98892
chr17	69325540	69325725	187	15	1.70502e-15	8.63144	SOX9	-791528	0.199589
chr17	71392687	71392772	87	10	5.14956e-11	6.87974	CDC42EP4	-84416	0.801517	SDK2	247498	1.2554
chr18	10203080	10203220	142	11	2.55982e-12	7.50517	APCDD1	-251475	0.796665	VAPA	289091	0.745982
chr18	24229256	24229376	122	11	2.55982e-12	7.50517	KCTD1	-99917	1.52951	AQP4	216466	1.66892
chr18	29598267	29598374	109	11	1.35111e-11	7.0883	TRAPPC8	-75258		RNF125	-14	1.1148
chr18	57183648	57183804	158	12	1.17525e-13	8.1306	LMAN1	-156532	1.25322	CCBE1	180886	0.883019
chr18	77172148	77172223	77	9	9.50298e-10	6.25431	CTDP1	-267615	0.862752	NFATC1	11850	1.42728
chr20	6556555	6556697	144	10	2.5623e-07	4.6105	FERMT1	-452435	1.92292	BMP2	-191685	2.21813
chr20	10635551	10635626	77	9	9.50298e-10	6.25431	JAG1	19105	1.15598	SLX4IP	219638
chr20	35144369	35144467	100	10	2.35072e-10	6.49761	MYL9	-25469	1.83074	DLGAP4	250160	0.806002
chr20	49668360	49668477	119	12	7.17315e-13	7.679	KCNG1	-28753	0.375264	NFATC2	490839	1
chr21	9825452	9826431	981	57	6.06387e-37	8.41812
chr22	20191312	20191416	106	11	2.55982e-12	7.50517	RTN4R	64690	1.00501	ZDHHC8	71893	1.06683
chr22	35237476	35237590	116	15	3.3401e-14	7.84547	LARGE	-921124	1.34558	ISX	-224596	1
chrX	5728725	5728842	119	12	1.94949e-11	6.81683	NLGN4X	418120	0.657364
chrX	19725696	19725804	110	15	1.2384e-17	9.8831	MAP3K15	-192371	0.712771	SH3KBP1	179969	1.21154
chrX	38455350	38455517	169	12	1.3873e-12	7.51023	MID1IP1	-207552	1.14605	TSPAN7	34811	3.98697
chrX	71335430	71335509	81	12	1.17525e-13	8.1306	CXCR3	-497110	1	PIN4	-66059	0.924208
