# Supplementary material for: Revised roles of ISL1 in a hES cell-based model of human heart chamber specification
Source: eLife. 2018 Jan 16;7:e31706. doi: 10.7554/eLife.31706 (PMC5770158; doi:10.7554/eLife.31706)
Supplement: Supplementary file 4. [file elife-31706-supp4.xls]

## Sheet: (A) Oligonucleotides
Gene	Product size (bp)	Fwd primer	Rev primer	Remarks / alternative name
Primers for RT-qPCR
ACTA2	119	TGTCCACCGCAAATGCTTCT	AGCTTTGGCTAGGAATGATTTGGA	SMA
ACTN2	75	GCCAGAGAGAAGGATGCAATCAC	AAGCATGGGAACCTGGAATCAA	encoding α-actinin
ANP	77	GCTGCAGCTTCCTGTCAACACT	AGGCGAGGAAGTCACCATCAA	NPPA
BMP4	91	TGAGTGCCATCTCCATGCTGTA	CGGCACCCACATCCCTCTACTA
BNP	81	CTGGCTGCTTTGGGAGGAAG	CCTCTTAATGCCGCCTCAGC	NPPB
CDH5	73	TGACCCTCAGGCACACCTTG	GGAAGATGCATGGGTGACCA
CTNC	80	CCTGGTCATGATGGTTCGGT	ACATGCGGAAGAGGTCAGAC	TNNC1
CTNT	87	GGCAGCTCCTGTTTGGAAATG	TTATTACTGGTGTGGAGTGGGTGTG	TNNT2
DHRS9	119	TCCGGTGGTAGAGTGCATGG	GCAAAGCTGCTGGCATGTG
HAND1	114	TCCCTTTTCCGCTTGCTCTC	CATCGCCTACCTGATGGACG
HEY1	111	GAATACGCCTGCATTTACCAGC	ATTGACCACTCGCACACCAT
IRX4	77	CGGAGCAGAAGAGGCCAGAT	CAGAACGGAACCGCCTTCTC
ISL1	95	TTTATTGTCGGAAGACTTGCCACTT	TCAAAGACCACCGTACAACCTTTATCT
ISL1	85	GTCTGATTTCCCTATGTGTTGGTTG	GCATGCCATTCCAAATCCGG	exon 2-specific primers - no amplification in ISL1 KO cells
KCNA5	86	CCAGCAGAGGGATAACCCAAAC	TTGGAACACATGGATGGAGGAG
KCNJ2	100	CAGATTCCCTGTTGGATTTACTTCG	AGGAATCTATGGCTCCTCCCAAA
KDR	118	TCCCTGCCGTGTTGAAGAGTT	CATTGAACCTCCCGCATTCA	FLK1
MEF2C	74	TCGCTTGTAAATGAGGGCATACAA	GTCCAGCTTATGCCGCTGTG
MEIS2 CDS	70	TGTTGCTGACCATCCAACACAA	TGAGCCAAGGAGCAGCATATAGTC
MEIS2 UTR	98	TGGTCCTCTGTTGCTTGATGAAA	TTCTGAACTTTGACCAGATGTTGACAC	covering all known isoforms
MLC2a	83	CAGATGTTCGCCCTGACACC	TCGTCTCCATGGGTGATGATG	MYL7
MLC2v	73	TGGTCCCTGCCCTCATCTCT	GGCAGCCACATGGCTAACAG	MYL2
MYH11	75	CCACACCTCAGACACGCACA	GTGGGAGCAGCGTCTCCTTT
MYH6	101	ACCTGGTGGACAAGCTGCAA	CACCTTGCGGAACTTGGACA
MYH7	74	TTGATCTGCTCAGCCCTGGA	GCTTCCTCCCAAGGAGCTGTT
MYL3	87	AAGTTGATGGCTGGGCAAGA	GCACGAGGTTTAGCTGGACA
MYL4	87	CTGGGCAAGAGGATGCCAAT	GCACCTGGAAGACTCTGCTTCA
NKX2.5	96	ACCGATCCCACCTCAACAGC	CTCCGCAGGAGTGAATGCAA
NR2F1	91	AGCCCACCCAGCAGAAATACA	TTTCCTCGCCAACGTGCTC	COUP-TF1
NR2F2	78	ACGGCACAGTATTGCTGACCTTT	TGGATAGCACTTGCAAGAGGAAGA	COUP-TFII
PDGFRA	82	TTGCTGTGAGCCTTGCATGA	GTGGGAGCATTTGTTAGGACTGG
PECAM1	86	GCACCGCCTGTGAAATACCA	CATCTGTGCTTGTTCCACCTTCA	CD31
RPL37A	84	GTGGTTCCTGCATGAAGACAGTG	TTCTGATGGCGGACTTTACCG	housekeeping gene used for normalization
SLN	105	ACCTGCACTCACAATATCTGCT	TCTACCGTTCCCTGGCAAAC
SOX2	111	TGGCGAACCATCTCTGTGGT	CCAACGGTGTCAACCTGCAT
TCF21	75	GCCGGGAAACCCGAGAGT	AGGTCAGGACGCGGTGGT
WT1	100	TCCACACCAAATGGCAATGG	AGTTGGTCTCTGCCCTGCCTAC
ChIP-qPCR primers
OTX2	77	CCCGCTCTCAGGGAGATTTG	CCCTGCCATTGGTTGGAGA	irrelevant locus used for normalization
MEF2C +19 Kb	90	ACCAAACCAACTTCCCAAATGC	TGCTTCCTGTGCAGCTGAAACT	homologous region of mouse ISL1-bound enhancer (PMIDs 27105846 and 15253934)
MEF2C -225 Kb	71	TCATTTAGGAAAGGGCTTAGTTGGT	GGCTGACAGAGTGACATGTGG	enriched in ChIP-seq
NR2F1 +10 Kb	91	AGCCCACCCAGCAGAAATACA	TTTCCTCGCCAACGTGCTC	in gene body (negative control)
NR2F1 -476 Kb	113	AGGTACATAATGGCTAGCAGGGTCC	AGAATGTCTGGGTTGCTGCATGTTT	enriched in ChIP-seq
NKX2.5 -10 Kb	79	TATCTCTCGTCCCCGCTGTT	GGCCCCAGTCTAGGTCCTAA	homologous region of mouse ISL1-bound enhancer (PMID 15843409)
NKX2.6 +7 Kb	90	GTGACCGGAGTGAATGATGGA	ACCGACAACTGCTTATCCTCTG	enriched in ChIP-seq
SOX2 +468 Kb	80	TACCTTGTTATCTGAGCCGCTG	GGGAGGCCTTTATCTGAAGAGC	enriched in ChIP-seq
TBX18 -203 Kb	71	GTGTTGAGTCCATTAGCAAGGC	AGAATGAAATCTGAGCCCTGTGA	enriched in ChIP-seq
Primers for ORF cloning
ISL1	1128	CACTGTGGACATTACTCCCTC	AATTTCCCACTTTCTCCAACAGG	excluding restriction sites, amplified from cDNA of differentiating hESCs
ISL1 - HA	1076	CACTGTGGACATTACTCCCTC	TGCCTCAATAGGACTGGCTA	excluding restriction sites, amplified from cDNA of differentiating hESCs excluding stop codon > ORF in frame with 3' HA-tag + stop
MEIS2 isoform D	1410	CTGATGGCGCAAAGGTACGATG	TTGGGCATGAATGTCCATAACCTG	excluding restriction sites, amplified from cDNA of differentiating hESCs excluding stop codon > ORF in frame with 3' HA-tag + stop
HAND1	645	ATGAACCTCGTGGGCAGCTAC	CTGGTTTAACTCCAGCGCCCAG	excluding restriction sites, amplified from cDNA of differentiating hESCs excluding stop codon > ORF in frame with 3' HA-tag + stop
Oligonucleotides for CRISPR gRNAs
ISL1	n/a	GATTGCCGCAACCAACACAT	GTATATTCTGAGGGTTTCTC	ISL1 CRISPR pair 1/1'
ISL1	n/a	GATAAGTCAAGTCAAAGAAA	GATTATAGCAAAGAGGAAGG	ISL1 CRISPR pair 2/2'
MEIS1	n/a	GTTCCAGCTCAGAGCTGCAT	GTTGAAGGGGGATGGGAAAGG	MEIS1 CRISPR pair 1/1'
MEIS1	n/a	GTGTGACGTGTGGCCACCGC	GGGGACAACAGCAGTGAGCA	MEIS1 CRISPR pair 2/2'
MEIS2	n/a	GGCCCTCTCCCGCAGCTCAG	GCCCTTTTCCCTTTCTGTTTC	MEIS2 CRISPR pair 1/1'
MEIS2	n/a	GACGTCTCCGCCAGCCACTCC	GCTCCTCCGACTCCTTCAACG	MEIS2 CRISPR pair 2/2'
NR2F1 -476kb	n/a	GCAGAAGGGGAGAAATAATTA	GCAGCTGTGTTATTGCCCTAC	NR2F1 -476kb pair 1/1'
NR2F1 -476kb	n/a	GTGCTGCATGTTTTCTTTAAC	GATTCTGTGGTTAAAACCAAG	NR2F1 -476kb pair 2/2'
Diagnostic primers spanning induced genomic deletions
ISL1	925 (WT)	TGCTAAGCGGTGATTTCCTCC	GTACAGGGTAACTTTGGCTTGTATG
MEIS1	1007 (WT)	CCCAGGCCTAATTGTGAGGTC	TGTGCTACTAAAGGGCTCACAG
MEIS2	525 (WT)	GGATGTTTCATTACGTTCCAACTGA	CTGGCCTTTCCTCCTTTCAAGTAA
NR2F1 -476kb	946 (WT)	ACTGACTCCTTCCCTAGCAAGT	AGCACAGGTAAGGGCATTGTT

## Sheet: (B) Antibodies
Antigen	Vendor	Cat. #	Dilution / quantity	Remarks / alternative name
α-actinin	Merck	A7811	1:800 IF
ANP	R&D	AF3366	1:2000 WB / 1:50 IF
CTNI	Santa Cruz	sc-15368	1:2000 WB / 1:200 IF	cardiac troponin I
CTNT	Thermo	MS-295-P	1:5000 WB / 1:150 IF / 1:200 FACS	cardiac troponin T
GAPDH	Thermo	AM4300	1:10,000 WB	Incubation in 1% milk / PBS-T
HA-tag	Cell Signaling Technology	3724	10 µg per 5 M cells ChIP	Used for ISL1 ChIP-seq
ISL1	DSHB	39-4D5	1:20 IF	hybridoma supernatant
ISL1	R&D	AF1837	1:000 WB / 1:100 IF / 10 µg per 5 M cells ChIP	Used for ISL1 ChIP-qPCR
MEIS2	Merck	05-779	1:2000 WB / 1:200 IF	cross-reactive with MEIS1
MLC2v	Proteintech	10906-1-AP	1:200 IF
MLC2v	Merck	MABT180	1:1000 WB
MYH6	R&D	MAB8979	1:250 WB / 1:50 IF
NKX2.5	R&D	AF2444	1:2000 WB / 1:150 IF
NR2F1	Cell Signaling Technology	6364	1:500 WB	COUP-TF1

## Sheet: (C) Signaling molecules
Small molecules	Manufacturer	Cat. #	Final conc. used	Remarks
4-Aminopyridine	Tocris	0940	50 µM	4-AP
AC 710	Tocris	5013	1 µM	PDGFR family inhibitor
AGN 193109	Tocris	5758	100 nM	pan-RAR antagonist
Apelin	Tocris	2420	1 µM	peptide agonist for APJ receptor
BMS453	Tocris	3409	1 µM
C-59	Tocris	5148	2 - 200 nM
CHIR99021	Axon Medchem	Axon 1386	0.25 - 1 µM
Dorsomorphin	Tocris	3093	50 - 250 nM
Doxycycline	Applichem	A2951	0.2 - 1 µg/ml
HDS 029	Tocris	2646	1 µM	ERBB receptor family inhibitor
PD0325901	Axon Medchem	Axon 1408	0.5 µM
PD173074	Merck	P2499	100 nM	FGFR inhibitor
RA	Merck	R2625	0.25 - 1 µM	all-trans retinoic acid
SAG	Tocris	4366	1 µM	Smoothened receptor agonist / activates hedghog signaling
SB431542	Merck	616461	15 µM
Y-27632	Abcam biochemicals	ab120129	10 µM
Recombinant proteins	Manufacturer	Cat. #	Final conc. used	Remarks
PDGF-BB	R&D	220-BB	10 ng/ml
Activin A	eBioscience	34-8993-85	5 ng/ml
BMP4	R&D	314-BP-050	0.5 - 1 ng/ml
FGF2	Peprotech	100-18B	10 ng/ml
LIF	R&D	7734-LF/CF	10 ng/ml	human LIF
NRG1	R&D	396-HB	100 ng/ml	Neuregulin
TGFβ1	eBioscience	34-8348-82	0.2 - 1 ng/ml
VEGF	R&D	293-VE-010	50 ng/ml
